# Supplementary material
Source: PubMed Central journal article supplement (PMC5947313)
Supplement: NIHMS917128-supplement-Supp__Table.pdf [file NIHMS917128-supplement-Supp__Table.pdf]

**Supporting Information Table S1. Primer sequences used for qRT-PCR**

| <b>Gene</b>     | <b>Forward</b>                    | <b>Reverse</b>                     |
|-----------------|-----------------------------------|------------------------------------|
| <i>PPARA</i>    | AGG CTG TAA GGG CTT CTT TCG       | GGC ATT TGT TCC GGT TCT TC         |
| <i>CPT2</i>     | GAA GAA GCT GAG CCC TGA TG        | GCC ATG GTA TTT GGA GCA CT         |
| <i>PPARGC1A</i> | GAA AGG GCC AAA CAG AGA GA        | GTA AAT CAC ACG GCG CTC TT         |
| <i>NRF1</i>     | TTA CTC TGC TGT GGC TGA TGG       | CCT CTG ATG CTT GCG TCG TCT        |
| <i>TFAM</i>     | AAT GTG GAG CGT GCT AAA AG        | AGC TGT TCT GTG GAA AAT CG         |
| <i>CCL2</i>     | CCA CTC ACC TGC TGC TAC TCA<br>T  | TGG TGA TCC TCT TGT AGC TCT<br>CC  |
| <i>TNF</i>      | CCA AGG CGC CAC ATC TCC CT        | GCT TTC TGT GCT CAT GGT GT         |
| <i>ITGAX</i>    | CTG GAT AGC CTT TCT TCT GCT<br>G  | GCA CAC TGT GTC CGA ACT C          |
| <i>CD68</i>     | AGC TCC CTT GGG CCA AAG           | AGG TGA ACA GCT GGA GAA<br>AGA ACT |
| <i>MRC1</i>     | CTC GTG GAT CTC CGT GAC AC        | GCA AAT GGA GCC GTC TGT GC         |
| <i>ACRP30</i>   | GCT CCT GCT TTG GTC CCT CCA<br>C  | GCC CTT CAG CTC CTG TCA TTC<br>C   |
| <i>GAPDH</i>    | CAA GGA GTA AGA AAC CCT<br>GGA CC | CGA GTT GGG ATA GGG CCT CT         |
